# Supplementary material for: Feshbach resonances in the F + CHD 3 → HF + CD 3 reaction
Source: Royal Society of Chemistry journal article supplement (doi:10.1039/d3sc02629a), 2023-01-01
Supplement: d3sc02629a1.pdf [file d3sc02629a1.pdf]

### Supplementary Information

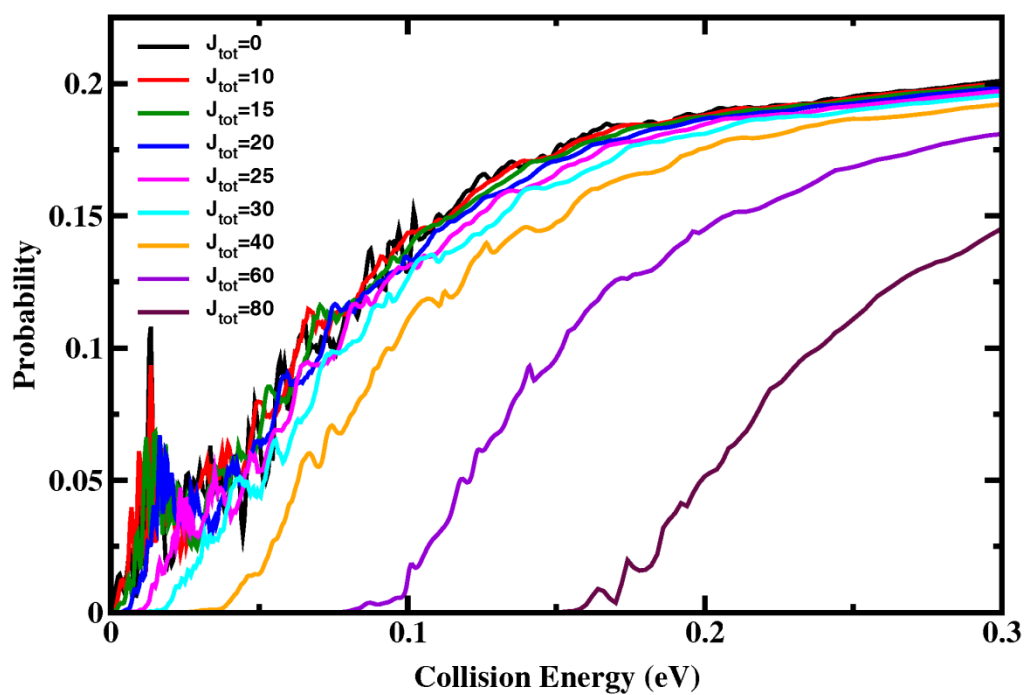

Fig. S1 The total reaction probabilities for the total angular momentum  $J_{tot}=0, 10, 15, 20, 25, 30, 40, 60, \text{ and } 80$  for the initial ground rovibrational state as a function of collision energy.

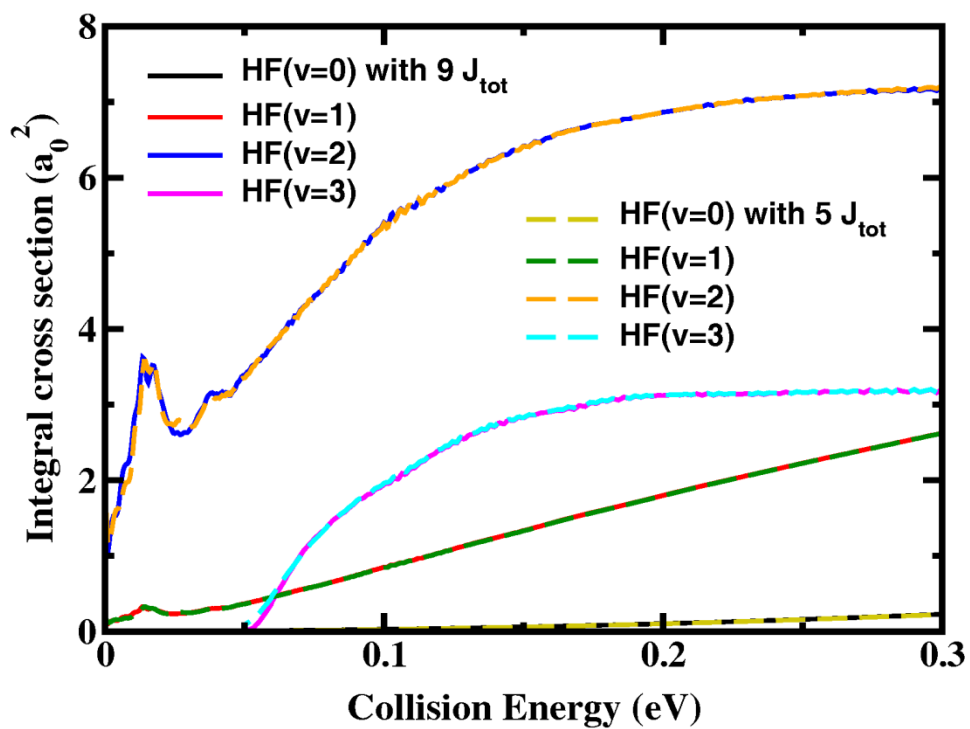

Fig. S2 Product HF vibrational state-resolved ICS as a function of collision energy calculated with  $9 J_{tot}$  (0, 10, 15, 20, 25, 30, 40, 60, 80), in comparison with those calculated with only  $5 J_{tot}$  (0, 20, 40, 60, 80).

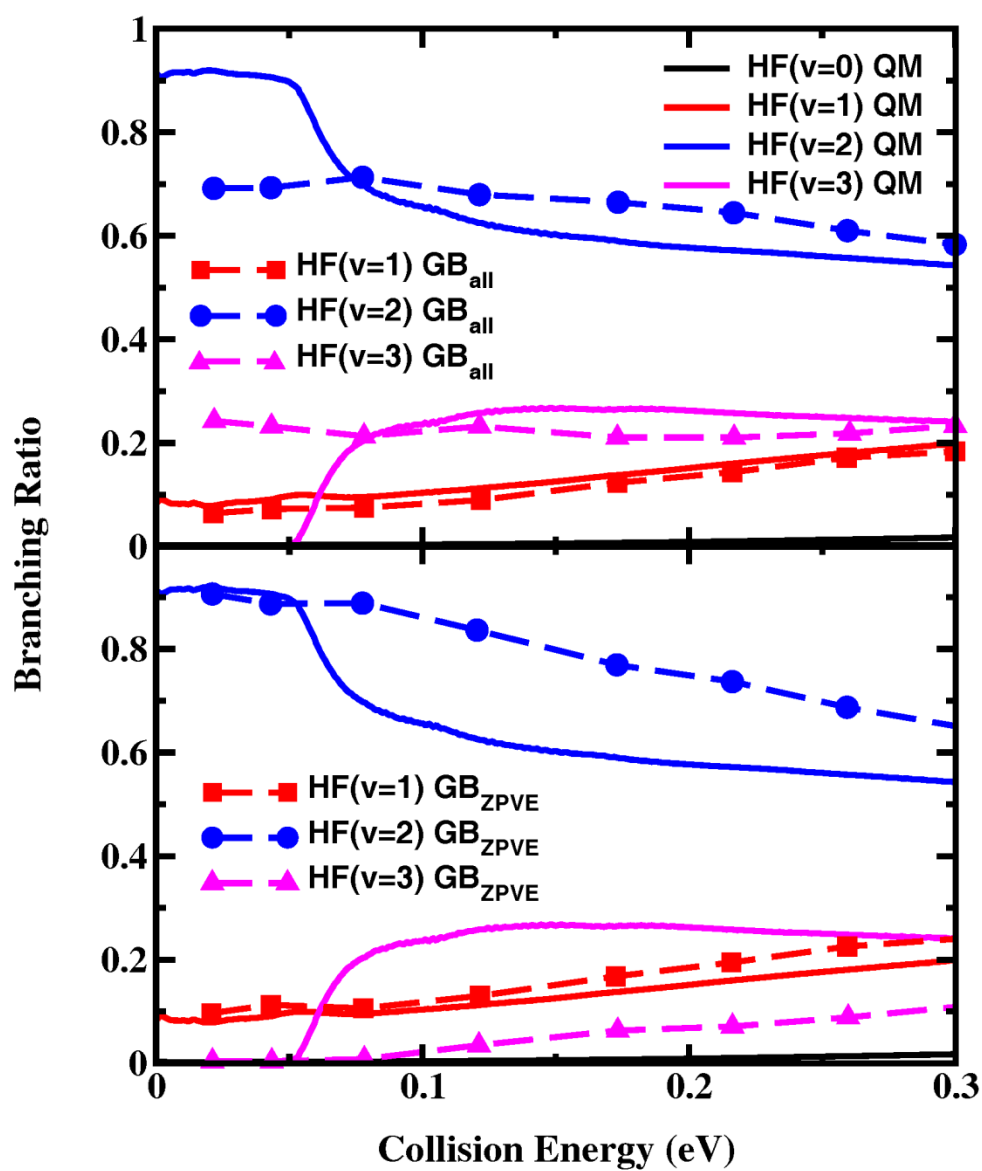

Fig. S3 Normalized HF vibrational populations as a function of collision energy for the title reaction, in comparison with the QCT results in Ref 45.

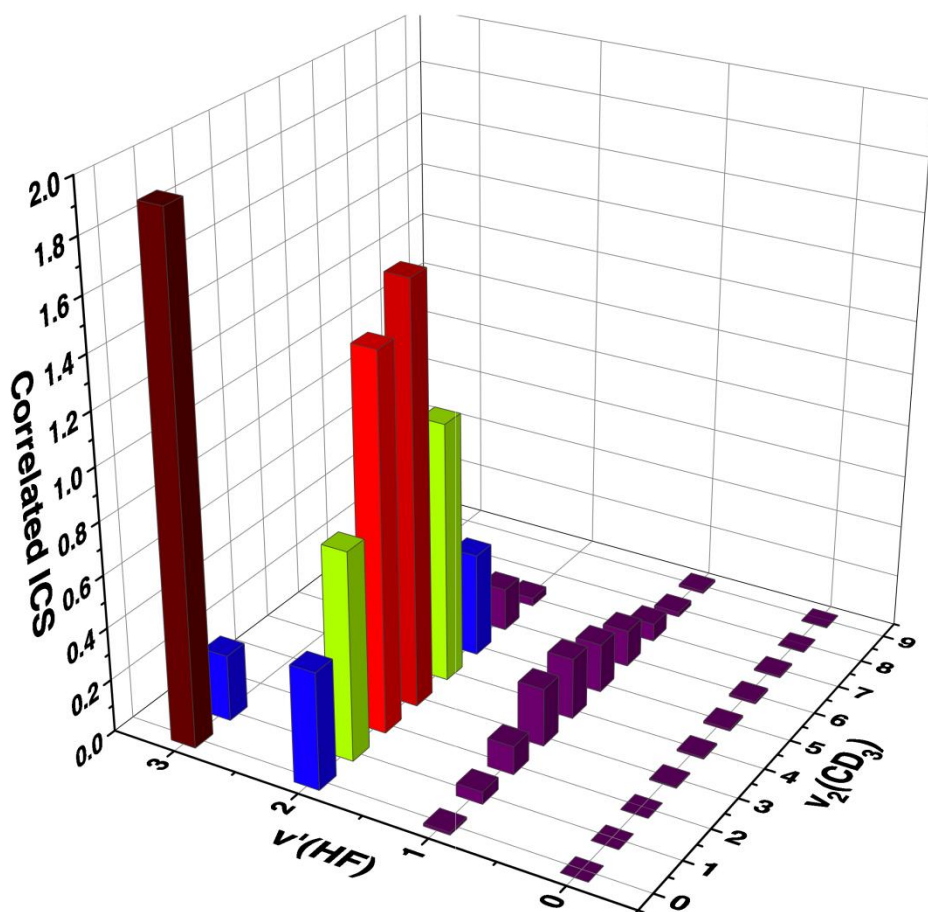

Fig. S4 3-dimensional representation of the correlated ICS of the product pair of HF( $v'$ ) and CD<sub>3</sub>( $v_2$ ) at the collision energy of 0.121 eV.

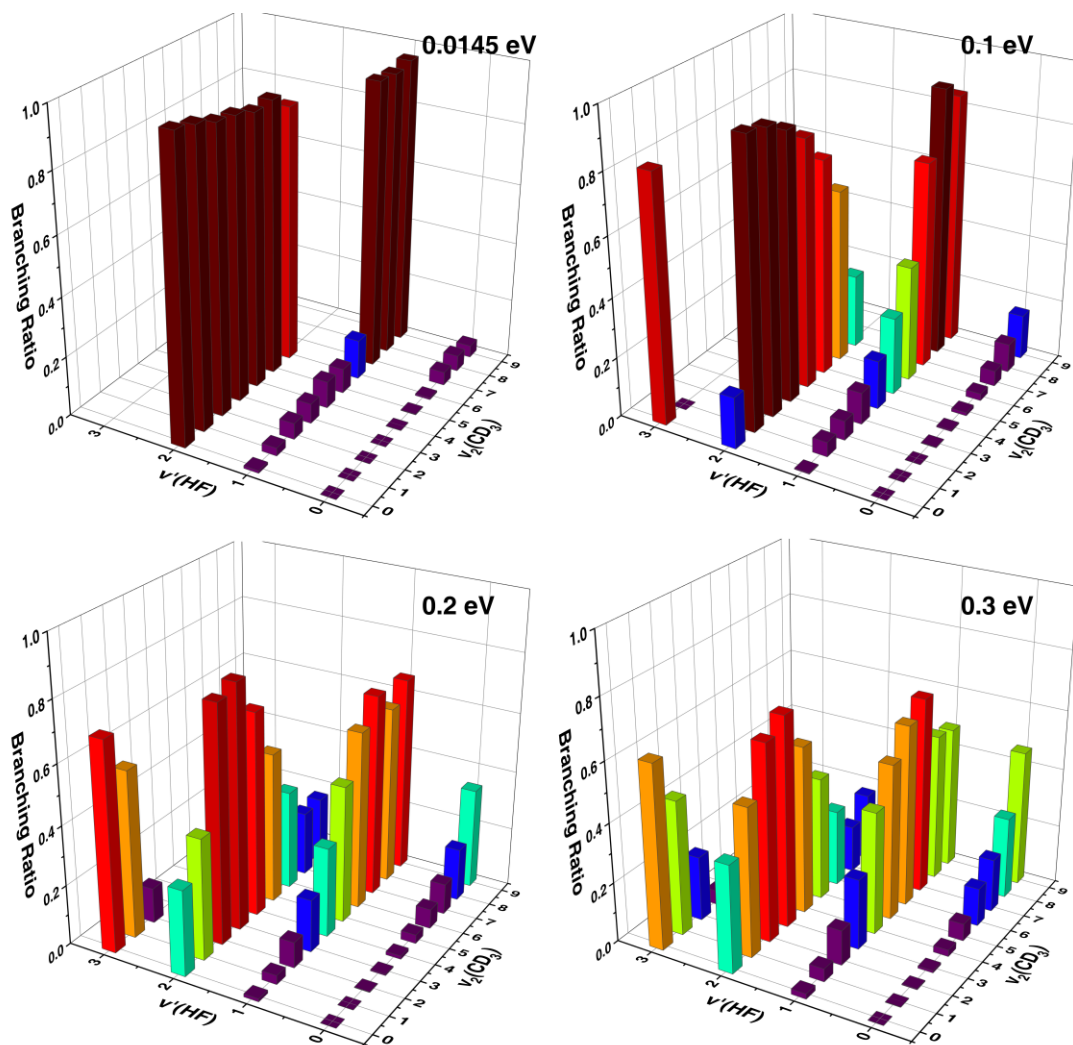

Fig. S5 3-dimensional representation of the correlated ICS of the product pair of HF( $v'$ ) and CD<sub>3</sub>( $v_2$ ) at the collision energy of 0.0145 eV, 0.1 eV, 0.2 eV and 0.3 eV, that the sum of correlated HF vibration populations for each CD<sub>3</sub> state at a given  $E_c$  are scaled to unity.

Table S1. Energy disposal (in eV) into HF( $v'$ )+CD<sub>3</sub>( $v_2$ ) products when HF vibrationally excited from  $v'=0$  to 3.

| HF state                                                    | $v'=0$ | $v'=1$ | $v'=2$ | $v'=3$ |
|-------------------------------------------------------------|--------|--------|--------|--------|
| $E_{\text{HF}}(v')$                                         | 0      | 0.491  | 0.96   | 1.409  |
| $E_c=0.0145$ eV                                             |        |        |        |        |
| $\langle E_{v_2} \rangle_{\text{CD}_3}$                     | 0.399  | 0.298  | 0.2    | –      |
| $\langle E_{v_2} \rangle_{\text{CD}_3} + E_{\text{HF}}(v')$ | 0.399  | 0.789  | 1.16   | –      |
| $E_c=0.1$ eV                                                |        |        |        |        |
| $\langle E_{v_2} \rangle_{\text{CD}_3}$                     | 0.368  | 0.276  | 0.171  | –      |
| $\langle E_{v_2} \rangle_{\text{CD}_3} + E_{\text{HF}}(v')$ | 0.368  | 0.767  | 1.132  | –      |
| $E_c=0.2$ eV                                                |        |        |        |        |
| $\langle E_{v_2} \rangle_{\text{CD}_3}$                     | 0.364  | 0.263  | 0.153  | 0.036  |
| $\langle E_{v_2} \rangle_{\text{CD}_3} + E_{\text{HF}}(v')$ | 0.364  | 0.754  | 1.114  | 1.445  |
| $E_c=0.3$ eV                                                |        |        |        |        |
| $\langle E_{v_2} \rangle_{\text{CD}_3}$                     | 0.359  | 0.25   | 0.143  | 0.049  |
| $\langle E_{v_2} \rangle_{\text{CD}_3} + E_{\text{HF}}(v')$ | 0.359  | 0.741  | 1.104  | 1.458  |

Table S2. Energy disposal (in eV) into HF( $\nu'$ )+CD<sub>3</sub>( $\nu_2$ ) products when CD<sub>3</sub> vibrationally excited from  $\nu_2=0$  to 9.

| CD <sub>3</sub> state                                        | $\nu_2=0$ | $\nu_2=1$ | $\nu_2=2$ | $\nu_2=3$ | $\nu_2=4$ | $\nu_2=5$ | $\nu_2=6$ | $\nu_2=7$ | $\nu_2=8$ | $\nu_2=9$ |
|--------------------------------------------------------------|-----------|-----------|-----------|-----------|-----------|-----------|-----------|-----------|-----------|-----------|
| $E_{\text{CD}_3(\nu_2)}$                                     | 0         | 0.056     | 0.119     | 0.186     | 0.257     | 0.331     | 0.407     | 0.486     | 0.567     | 0.649     |
| $E_c=0.0145$ eV                                              |           |           |           |           |           |           |           |           |           |           |
| $\langle E_\nu \rangle_{\text{HF}}$                          | 0.956     | 0.947     | 0.935     | 0.929     | 0.917     | 0.919     | 0.892     | 0.469     | 0.465     | 0.471     |
| $\langle E_\nu \rangle_{\text{HF} + E_{\text{CD}_3(\nu_2)}}$ | 0.956     | 1.004     | 1.054     | 1.115     | 1.174     | 1.25      | 1.3       | 0.955     | 1.031     | 1.12      |
| $E_c=0.1$ eV                                                 |           |           |           |           |           |           |           |           |           |           |
| $\langle E_\nu \rangle_{\text{HF}}$                          | 1.328     | 0.937     | 0.929     | 0.908     | 0.879     | 0.827     | 0.755     | 0.583     | 0.443     | 0.416     |
| $\langle E_\nu \rangle_{\text{HF} + E_{\text{CD}_3(\nu_2)}}$ | 1.328     | 0.993     | 1.048     | 1.095     | 1.136     | 1.158     | 1.162     | 1.069     | 1.01      | 1.065     |
| $E_c=0.2$ eV                                                 |           |           |           |           |           |           |           |           |           |           |
| $\langle E_\nu \rangle_{\text{HF}}$                          | 1.27      | 1.198     | 0.971     | 0.873     | 0.808     | 0.715     | 0.616     | 0.542     | 0.509     | 0.324     |
| $\langle E_\nu \rangle_{\text{HF} + E_{\text{CD}_3(\nu_2)}}$ | 1.27      | 1.254     | 1.09      | 1.059     | 1.065     | 1.046     | 1.023     | 1.028     | 1.076     | 0.973     |
| $E_c=0.3$ eV                                                 |           |           |           |           |           |           |           |           |           |           |
| $\langle E_\nu \rangle_{\text{HF}}$                          | 1.23      | 1.143     | 1         | 0.864     | 0.745     | 0.657     | 0.549     | 0.477     | 0.462     | 0.292     |
| $\langle E_\nu \rangle_{\text{HF} + E_{\text{CD}_3(\nu_2)}}$ | 1.23      | 1.199     | 1.119     | 1.05      | 1.003     | 0.989     | 0.956     | 0.963     | 1.029     | 0.941     |

## A. Numerical parameters

The numerical parameters used in reactant Jacobi coordinates are as following: A total number of 280 sine basis functions covering a range from 3.0 to 19.8 bohrs were used for  $R$  with 140 grid points in the interaction region. For the  $r$  dimension, 100 basis functions were used in the range of [1.0,11.0] bohrs in the interaction region, while 6 basis functions were used in the asymptotic region. The number of basis functions for the umbrella motion was 16. The rotational basis functions were constrained by the parameters,  $J_{max}=204$ ,  $l_{max}=180$ ,  $j_{max}=24$ . The center of the prepared Gaussian wave packet was located at  $R_0=18.0$  bohrs, with the width of  $\delta=0.2$  bohr, and the central energy of  $E_0=0.15$  eV. For total angular momentum  $J_{tot}=0$ , we propagated the wave packets for 150,000 a.u. of time with a time step of 10 to converge the reaction probabilities. The absorption potential on the  $r$  coordinate for the MRPD calculation takes the form

$$V_p(r) = C \left( \frac{r-r^0}{\Delta r} \right)^n,$$

with  $r^0=9.0$  a.u.,  $\Delta r=2.0$  a.u.,  $C=0.04$ , and  $n=1.5$ . To minimize the computational cost, the coordinate transformation is carried out at every 8 propagation time steps. Continuous propagation in the product Jacobi coordinates only involves a total number of 300 sine functions for the translational coordinate in a range of [3.0,21.0] bohrs and 7 vibrational basis functions for HF bond. The number of basis functions for the umbrella motion was 11. The rotational basis functions were constrained by the parameters,  $J'_{max}=54$ ,  $l'_{max}=30$ , and  $j'_{max}=24$ . A dividing surface is placed at  $R'=15.5$  bohr to extract  $S$  matrix elements. The number of  $K'$ -blocks included in the product calculation increases with the total angular momentum, from 1 for  $J_{tot}=0$ , up to 6 for  $J_{tot}=80$ .
